# Supplementary material
Source: HighWire-hosted journal article supplement (doi:10.1101/rna.079509.122)
Supplement: Supplemental_Legends.docx [file Supplemental_Legends.docx]

**Supplemental Material**

**Supplemental Fig S1. The analysis of lentivirus-infected HEK293T cells, MEFs and embryos**

1. Bright-field and GFP microscopy images of lentivirus-infected HEK293T cells expressing NeonGreen-ADAR1p150 WT (top panels) and NeonGreen-ADAR1L196C*fs* (bottom panels). The scale bar represents 50μm.
2. Western blot analysis of NeonGreen, ADAR1 and ACTIN expression from uninfected HEK293T cells, lentivirus-infected HEK293T cells expressing NeonGreen-ADAR1p150 WT or NeonGreen-ADAR1L196C*fs*. The predicted fusion protein of NeonGreen-ADAR1p150 WT is ~178kDa, and NeonGreen-ADAR1L196C*fs* is ~50kDa.
3. Western blot analysis of *Adar1+/+* and *Adar1p150-/-* MEFs generated from 3 independent mice of each genotype with and without 24 hours IFNβ treatment. The relative expression of p110 is presented in Fig 1F.
4. Expression of the interferon-stimulated genes (ISGs) *Ifit1* and *Irf7* in the heads of *Adar1p150-/-*embryos at E11.5 and E12.5. Data expressed as mean +/- SEM gene expression relative to *Ppia* expression. Three independent embryo samples were used for each indicated genotype. Significance was determined by one-way ANOVA tests with Dunnett’s multiple comparisons with statistical significance of ***P <0.001 and ****P <0.0001. Error bars are SEM.

**Supplemental Fig S2. Cell counts and hematopoietic stem cell populations in peripheral blood (PB), bone marrow (BM), spleen and thymus of the somatic mouse models.**

1. Genotyping of genomic DNA from all animals used in the somatic deletion model and percentage deletion of the floxed allele on the day of euthanasia using DNA isolated from whole BM.
2. Total red blood cell (RBC) counts in PB at day 0 (pre-tamoxifen) and day of euthanasia (final).
3. Haemoglobin (HGB) level in PB at day 0 (pre-tamoxifen) and day of euthanasia.
4. Mean corpuscular volume (MCV) of PB at day 0 (pre-tamoxifen) and day of euthanasia.
5. Mean corpuscular haemoglobin (MCH) level in PB at day 0 (pre-tamoxifen) and day of euthanasia (final).
6. The mean corpuscular haemoglobin concentration (MCHC) in PB at day 0 (pre-tamoxifen) and day of euthanasia(final).
7. Differential analysis of leukocyte populations in the BM on the day of euthanasia.
8. Weights of the spleen.
9. Weights of the thymus.

Statistical tests used were two-way ANOVA with Bonferroni’s multiple comparisons (panels B-G) and unpaired T-test (panels H-I) with statistical significance of *P <0.05; **P <0.01, ***P <0.001, ****P <0.0001. Displayed as mean +/- SEM. *Δ/+* n= 5, *Δ/p150-* n=6.

**Supplemental Fig S3. Western bot analysis of PKR activation in MEFs and assessment of RNA integrity**

1. Western blot analysis of *Adar1+/+* (n=1) and *Adar1p150-/-* (n=3) MEFs generated from independent mice of each genotype with and without 24 hours IFNβ treatment. All images are from the same gel and re-probed for ADAR1, MDA5, PKR, phospho eIF2α (p-eIF2α), total eIF2α and ACTIN. The images have been cropped and rearranged for presentation. Quantification represents the expression of p-eIF2α relative to total teIF2α.
2. Labchip (PerkinElmer) analysis of total RNA integrity from mouse whole brain tissue taken on the day of birth of *Adar1-/-Ifih1-/-* (lacking ADAR1p150 and ADAR1p110 isoforms) *Adar1E861A/E861AIfih1-/-* (ADAR1 editing-deficient) and *Adar1+/+Ifih1-/-* (ADAR1 WT) mice. No difference in RNA integrity or degradation was found between genotypes.

Quantification of Ribosomal RNA peaks the brain, liver and heart tissues of the indicated genotype from lab chip data.
